# Supplementary material for: Intestinal microbiota-derived tryptophan metabolites are predictive of Ah receptor activity
Source: PubMed Central journal article supplement (PMC7524359; doi:10.1080/19490976.2020.1788899), 2020-08-12
Supplement: KGMI_A_1788899_SM3941.pdf [file KGMI_A_1788899_SM3941.pdf]

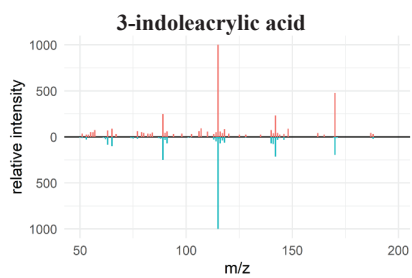

Similarity score: 734 (dot)/940 (rev-dot)

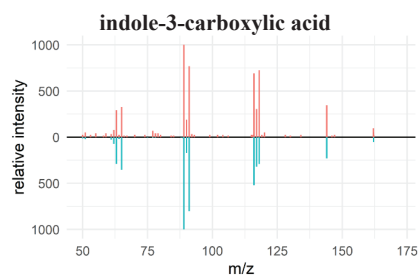

Similarity score: 891 (dot)/982 (rev-dot)

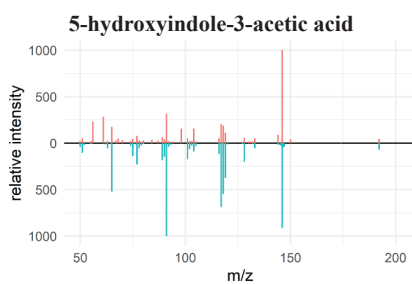

Similarity score: 804 (dot)/929 (rev-dot)

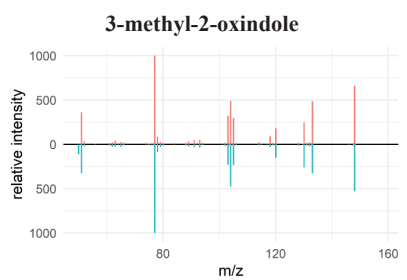

Similarity score: 967 (dot)/980 (rev-dot)

■ Sample ■ Standard

Figure S1. LC/MS/MS scoring validation of identity between standards and indicated tryptophan metabolites which exhibit novel AHR-dependent activity and detected in mouse cecal contents or human feces.

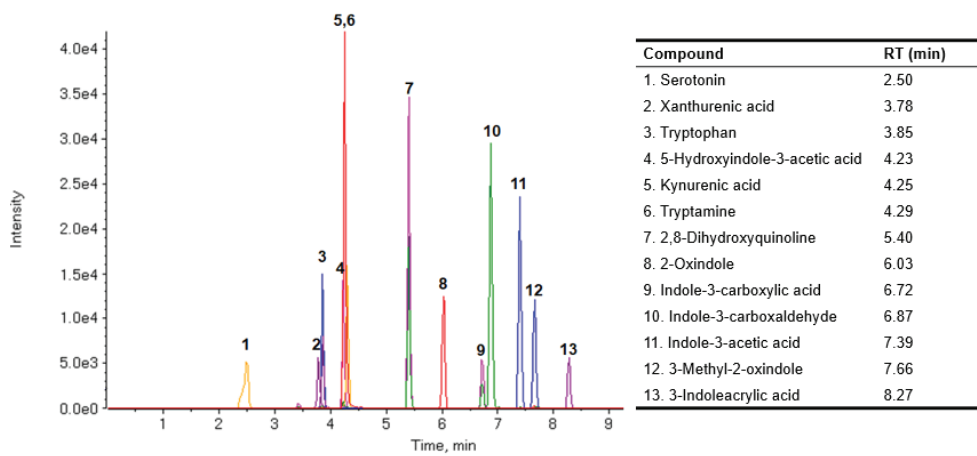

Figure S2. Representative UHPLC chromatogram of indicated daughter ion retention times (Table S1) associated with the tryptophan metabolites

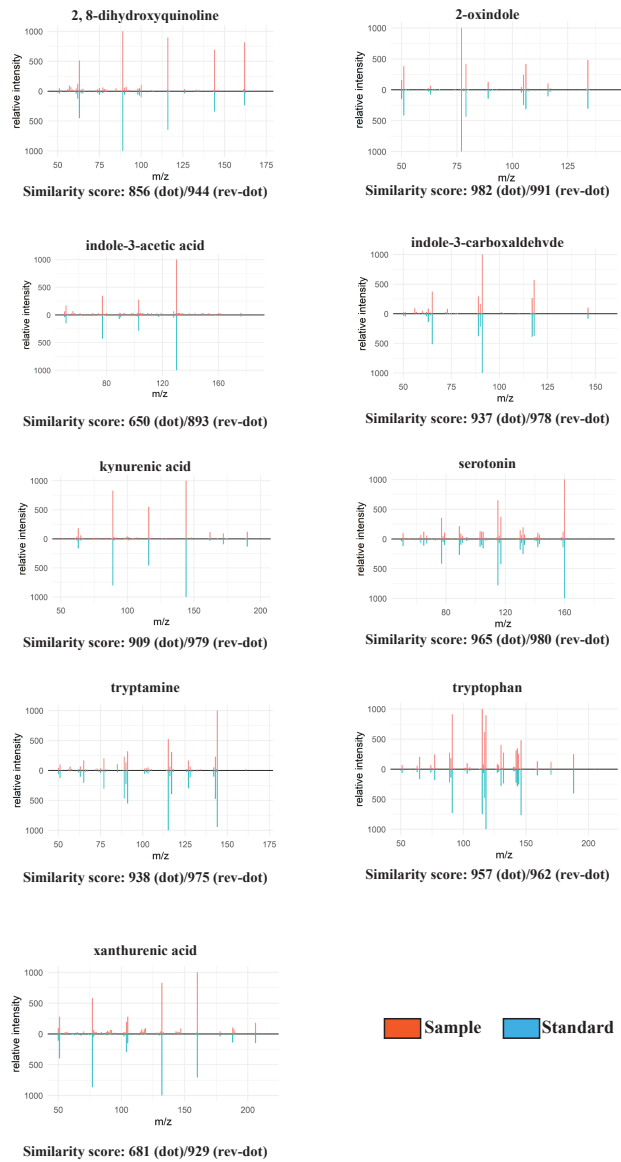

Figure S3. LC/MS/MS scoring validation of identity between standards and indicated tryptophan metabolites detected in mouse cecal contents or human feces.

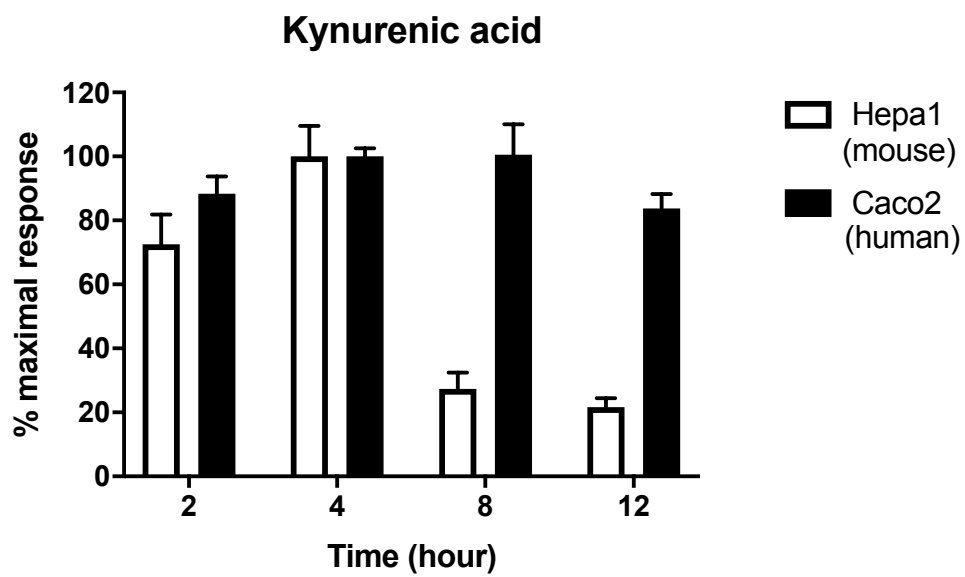

Figure S4. Time course assessment of Cyp1a1 mRNA induction after kynurenic acid treatment of Caco2 and Hepa 1 cells.

Table S1. List of cecal/fecal tryptophan metabolites quantified by a combination of LC/MS and GC/MS platforms and their extracted ions/fragments.

| Compound                      | Chemical composition | Parent ion | Daughter ion/fragments | Platform |
|-------------------------------|----------------------|------------|------------------------|----------|
| Indole-3-acetic acid          | C10H9NO2             | 175.06     | 130.06                 | LC/MS/MS |
| 3-Indoleacrylic acid          | C11H9NO2             | 187.06     | 115.02                 | LC/MS/MS |
| Tryptamine                    | C10H12N2             | 160.10     | 144.08                 | LC/MS/MS |
| Serotonin                     | C10H12N2O            | 176.09     | 160.05                 | LC/MS/MS |
| Indole-3-carboxaldehyde       | C9H7NO               | 145.05     | 91.05                  | LC/MS/MS |
| 2,8-Dihydroxyquinoline        | C9H7NO2              | 161.05     | 116.02                 | LC/MS/MS |
| Kynurenic acid                | C10H7NO3             | 189.04     | 144.03                 | LC/MS/MS |
| Xanthurenic acid              | C10H7NO4             | 205.04     | 132.01                 | LC/MS/MS |
| 2-Oxindole                    | C8H7NO               | 133.05     | 77.01                  | LC/MS/MS |
| Indole-3-carboxylic acid      | C9H7NO2              | 161.05     | 89.01                  | LC/MS/MS |
| 3-Methyl-2-oxindole           | C9H9NO               | 147.07     | 104.03                 | LC/MS/MS |
| 5-Hydroxyindole-3-acetic acid | C10H9NO3             | 191.06     | 146.03                 | LC/MS/MS |
| Tryptophan                    | C11H12N2O2           | 204.09     | 118.07                 | LC/MS/MS |
| Indole                        | C8H7N                | /          | 117, 90, 63, 50, 74    | GC/MS    |
| 3-Methylindole                | C9H9N                | /          | 130, 131, 77, 51, 103  | GC/MS    |

Table S2. Range of linearity and correlation coefficient ( $R^2$ ) for the quantitation of AHR-related compounds.

| <b>Compound</b>               | <b>Linear equation</b>  | <b>R square</b> | <b>Linearity range (nM)</b> |
|-------------------------------|-------------------------|-----------------|-----------------------------|
| Indole-3-acetic acid          | $y = 0.0004x + 0.0146$  | 0.9918          | 10-1000                     |
| 3-Indoleacrylic acid          | $y = 0.0002x + 0.0015$  | 0.9991          | 10-1000                     |
| Tryptamine                    | $y = 0.0002x + 0.0090$  | 0.9880          | 10-1000                     |
| Serotonin                     | $y = 0.00007x - 0.0014$ | 0.9824          | 10-1000                     |
| Indole-3-carboxaldehyde       | $y = 0.0005x + 0.0192$  | 0.9930          | 10-1000                     |
| 2,8-Dihydroxyquinoline        | $y = 0.0005x + 0.0198$  | 0.9860          | 30-2000                     |
| Kynurenic acid                | $y = 0.0008x + 0.0322$  | 0.9903          | 10-1000                     |
| Xanthurenic acid              | $y = 0.0006x + 0.0040$  | 0.9990          | 10-1000                     |
| 2-Oxindole                    | $y = 0.0003x + 0.0043$  | 0.9978          | 10-1000                     |
| Indole-3-carboxylic acid      | $y = 0.0001x + 0.0011$  | 0.9990          | 10-1000                     |
| 3-Methyl-2-oxindole           | $y = 0.0003x + 0.0042$  | 0.9989          | 10-1000                     |
| 5-Hydroxyindole-3-acetic acid | $y = 0.0002x + 0.0036$  | 0.9915          | 10-1000                     |
| Tryptophan                    | $y = 0.0001x + 0.0979$  | 0.9805          | 100-10000                   |
| Indole                        | $y = 0.0081x - 0.0032$  | 0.9986          | 2000-100000                 |
| 3-Methylindole                | $y = 0.0106x - 0.0792$  | 0.9908          | 2000-100000                 |

Table S3. Parameters of Trp metabolite quantification in cecal contents of pathogen-free mice.<sup>a</sup>

| <b>Compound</b>               | <b>LOQ<br/>(nmol/g)</b> | <b>Concentration<br/>(nmol/g)</b> | <b>Recovery (%)</b> | <b>Matrix effect (%)</b> |
|-------------------------------|-------------------------|-----------------------------------|---------------------|--------------------------|
| Indole-3-acetic acid          | 0.07                    | 4.57 ± 0.50                       | 130.2 ± 14.4        | 58.2 ± 6.3               |
| 3-Indoleacrylic acid          | 0.06                    | 0.09 ± 0.02                       | 147.6 ± 43.6        | 100.7 ± 14.4             |
| Tryptamine                    | 0.05                    | 3.62 ± 0.62                       | 87.6 ± 1.1          | 79.0 ± 1.9               |
| Serotonin                     | 0.33                    | 0.85 ± 0.13                       | 139.8 ± 28.1        | 62.2 ± 8.0               |
| Indole-3-carboxaldehyde       | 0.06                    | 4.74 ± 0.53                       | 119.2 ± 8.5         | 81.6 ± 1.6               |
| 2,8-Dihydroxyquinoline        | 0.26                    | 4.63 ± 1.34                       | 116.6 ± 11.8        | 69.3 ± 3.0               |
| Kynurenic acid                | 0.16                    | 7.43 ± 0.34                       | 94.6 ± 6.2          | 87.1 ± 2.9               |
| Xanthurenic acid              | 0.18                    | 0.66 ± 0.04                       | 106.5 ± 8.9         | 95.5 ± 6.7               |
| 2-Oxindole                    | 0.08                    | 26.28 ± 1.03                      | 99.3 ± 1.9          | 74.0 ± 0.7               |
| Indole-3-carboxylic acid      | 0.33                    | 0.62 ± 0.09                       | 122.1 ± 20.6        | 62.2 ± 8.4               |
| 5-Hydroxyindole-3-acetic acid | 0.38                    | 0.84 ± 0.17                       | 81.2 ± 9.5          | 62.4 ± 6.1               |
| Indole                        | 2.00                    | 71.29 ± 4.58                      | 94.9 ± 1.9          | 94.4 ± 4.4               |

<sup>a</sup>: Both 3-methyl indole and 3-methyl-2-oxindole were below LOQ.

Table S4. Parameters of Trp metabolite quantification in defined diet human feces.<sup>a</sup>

| Compound                    | LOQ (nmol/g) | Number of detected samples<br>N= 44 <sup>b</sup> | Concentration (nmol/g) <sup>c</sup> | Recovery (%) | Matrix effect (%) |
|-----------------------------|--------------|--------------------------------------------------|-------------------------------------|--------------|-------------------|
| indole-3-acetic acid        | 0.20         | 44                                               | 9.90±12.17                          | 37.2         | 59.6±6.4          |
| 3-indoleacrylic acid        | 0.22         | 4                                                | 0.48±0.05                           | 35.4         | 24.3±11.2         |
| tryptamine                  | 0.09         | 12                                               | 5.61±6.21                           | 72.3         | 83.2±13.3         |
| serotonin                   | 0.13         | 4                                                | 5.92±8.65                           | 43.7         | 61.31±32.5        |
| indole-3-carboxaldehyde     | 0.04         | 44                                               | 2.48±2.22                           | 49.7         | 121.6±38.5        |
| 2,8-dihydroxy-quinoline     | 0.02         | 19                                               | 0.86±0.87                           | 21.5         | 97.7±32.6         |
| kynurenic acid              | 1.41         | 44                                               | 3.77±2.70                           | 36.5         | 106.4±28.0        |
| xanthurenic acid            | 0.21         | 30                                               | 0.96±0.63                           | 30.3         | 135.7±43.1        |
| 2-oxindole                  | 0.04         | 41                                               | 37.93±45.91                         | 27.7         | 86.5±11.6         |
| 3-methyl-2-oxindole         | 0.03         | 15                                               | 3.45±5.59                           | 34.4         | 44.7±22.5         |
| 5-hydroindole-3-acetic acid | 0.85         | 21                                               | 0.69±0.26                           | 58.0         | 60.8±14.0         |
| indole                      | 24.27        | 44                                               | 192.53±212.33                       | 93.0         | 104.0±14.7        |
| 3-methylindole              | 22.61        | 17                                               | 84.0±62.03                          | 102.3        | 302.8±122.6       |

<sup>a</sup>: Indole-3-carboxylic acid was below LOQ.

<sup>b</sup>: Indicates the total number of samples.

<sup>c</sup>: Concentration of each compound represents mean +/- SEM concentration across only those samples quantified as >LOQ.



Table S5. Parameters of Trp metabolite quantification in Ad libitum diet human feces.<sup>a</sup>

| Compound                      | LOQ (nmol/g) | Number of detected samples n=29 <sup>b</sup> | Observed concentration (nmol/g) <sup>c</sup> | Recovery (%) | Matrix effect (%) |
|-------------------------------|--------------|----------------------------------------------|----------------------------------------------|--------------|-------------------|
| indole-3-acetic acid          | 0.37         | 29                                           | 4.80±3.83                                    | 37.2         | 59.6±6.4          |
| tryptamine                    | 0.12         | 15                                           | 5.84±8.28                                    | 72.3         | 83.2±13.3         |
| serotonin                     | 0.09         | 7                                            | 3.09±1.67                                    | 43.7         | 61.3±32.5         |
| indole-3-carboxaldehyde       | 0.03         | 29                                           | 3.69±2.60                                    | 49.7         | 121.6±38.5        |
| 2,8-dihydroxy-quinoline       | 0.17         | 8                                            | 0.83±0.37                                    | 21.5         | 97.7±32.6         |
| kynurenic acid                | 0.28         | 27                                           | 4.90±3.57                                    | 36.5         | 106.4±28.0        |
| xanthurenic acid              | 0.13         | 18                                           | 1.90±2.03                                    | 30.3         | 135.7±43.1        |
| 2-oxindole                    | 0.07         | 29                                           | 29.19±44.76                                  | 27.7         | 86.5±11.6         |
| indole-3-carboxylic acid      | 0.17         | 3                                            | 1.74±0.62                                    | 25.5         | 93.5±12.5         |
| 3-methyl-2-oxindole           | 0.01         | 8                                            | 2.41±2.92                                    | 34.4         | 44.7±22.5         |
| 5-hydroxyindole-3-acetic acid | 0.16         | 14                                           | 0.72±0.31                                    | 58.0         | 60.8±14.0         |
| indole                        | 8.09         | 29                                           | 469.75±601.96                                | 93.0         | 104.0±14.7        |
| 3-methylindole                | 7.53         | 6                                            | 229.84±243.62                                | 102.3        | 302.8±122.6       |

<sup>a</sup>: 3-indoleacrylic acid was below LOQ.

<sup>b</sup>: Indicates the total number of samples.

<sup>c</sup>: Concentration of each compound represents mean +/- SEM concentration across only those samples quantified as >LOQ.
